# Supplementary material for: A Matching-Adjusted Indirect Comparison of Pembrolizumab + Chemotherapy vs. Nivolumab + Ipilimumab as First-Line Therapies in Patients with PD-L1 TPS ≥1% Metastatic NSCLC
Source: MDPI journal article supplement (doi:10.3390/cancers12123648), 2020-12-04
Supplement: s1 [file s1]

# Supplementary materials: A Matching-Adjusted Indirect Comparison of Pembrolizumab + Chemotherapy vs Nivolumab + Ipilimumab as First-Line Therapies in Patients with PD-L1 TPS $\geq 1\%$ Metastatic NSCLC

Balazs Halmos, Thomas Burke, Chrysostomos Kalyvas, Ralph Insinga, Kristel Vandormael, Andrew Frederickson and Bilal Piperdi

**Table S1.** Overall survival and progression-free survival in patients with PD-L1 TPS  $\geq 1\%$  before matching.

|                                                                                | Outcomes                 |                           |
|--------------------------------------------------------------------------------|--------------------------|---------------------------|
|                                                                                | Overall Survival         | Progression-Free Survival |
| <b>ITC HR (95% CI), p-value<sup>a</sup></b>                                    |                          |                           |
| Primary approach <sup>b</sup>                                                  | 0.84 (0.63, 1.11), 0.218 | 0.58 (0.46, 0.74), <0.001 |
| Secondary approach <sup>c</sup>                                                | 0.82 (0.64, 1.04), 0.102 | 0.62 (0.49, 0.77), <0.001 |
| <b>Number of events, (%)</b>                                                   |                          |                           |
| Pembrolizumab+chemotherapy                                                     | 273 (57.6)               | 356 (75.1)                |
| Nivolumab+ipilimumab                                                           | 259 (65.4)               | 289 (73.0)                |
| KN189/407/021G: Chemotherapy <sup>d</sup>                                      | 241 (70.5)               | 310 (90.6)                |
| Checkmate 227: Chemotherapy <sup>d</sup>                                       | 299 (75.3)               | 286 (72.0)                |
| <b>Median Months, (95% CI)</b>                                                 |                          |                           |
| Pembrolizumab+chemotherapy                                                     | 22.0 (19.7; 25.2)        | 9.2 (8.3; 10.9)           |
| Nivolumab+ipilimumab                                                           | 16.9 (15.0; 20.0)        | 5.0 (4.0; 6.2)            |
| KN189/407/021G: Chemotherapy <sup>d</sup>                                      | 13.6 (10.9; 15.7)        | 4.9 (4.6; 6.0)            |
| Checkmate 227: Chemotherapy <sup>d</sup>                                       | 14.9 (12.5; 16.8)        | 5.5 (4.8; 5.9)            |
| <b>Landmark rate (%) – Pembrolizumab+chemotherapy vs. Nivolumab+ipilimumab</b> |                          |                           |
| 6-month                                                                        | 85.4 vs 75.2             | 70.2 vs 45.6              |
| 1-year                                                                         | 69.3 vs 62.4             | 43.5 vs 32.8              |
| 2-year                                                                         | 46.6 vs 39.8             | 26.7 vs 22.0              |

- a: Two-sided p-value calculated from the test statistic associated with the ITC estimate and its standard error
- b: Calculated using aggregate data published in the literature for nivolumab+ipilimumab. Bucher methodology using separate study results (estimate and its standard error) with a common control arm
- c: Calculated using pseudo-IPD from CheckMate227 Part 1A using a Cox regression model
- d: Platinum-doublet chemotherapy for KN021G/KN0189/KN407 and CheckMate227 Part 1A
- CI: confidence interval; ITC: indirect treatment comparison; HR: hazard ratio; ITT: Intention-to-Treat; KN021: KEYNOTE-021 Cohort G; KN189: KEYNOTE-189; KN407: KEYNOTE-407; PD-L1: Programmed cell death ligand 1; TPS: tumor proportion score.

**Table S2.** Landmark analysis of overall survival and progression-free survival for chemotherapy arms from KN021G/KN189/KN407 and CheckMate 227 Part 1a before and after matching.

|                           | Landmark rate<br>6 month, % | Landmark rate<br>1-year, % | Landmark rate<br>2-year, % |
|---------------------------|-----------------------------|----------------------------|----------------------------|
| Overall survival          |                             |                            |                            |
| Before Matching           | 76.5 vs 78.4                | 53.3 vs 56.3               | 34.3 vs 33.3               |
| After Matching            | 76.4 vs 78.4                | 53.9 vs 56.3               | 32.4 vs 33.3               |
| Progression-free survival |                             |                            |                            |
| Before Matching           | 44.6 vs 42.6                | 20.3 vs 18.8               | 8.0 vs 7.3                 |
| After Matching            | 44.1 vs 42.6                | 20.2 vs 18.8               | 4.7 vs 7.3                 |

KN021G: KEYNOTE-021 Cohort G; KN189: KEYNOTE-189; KN407: KEYNOTE-407.

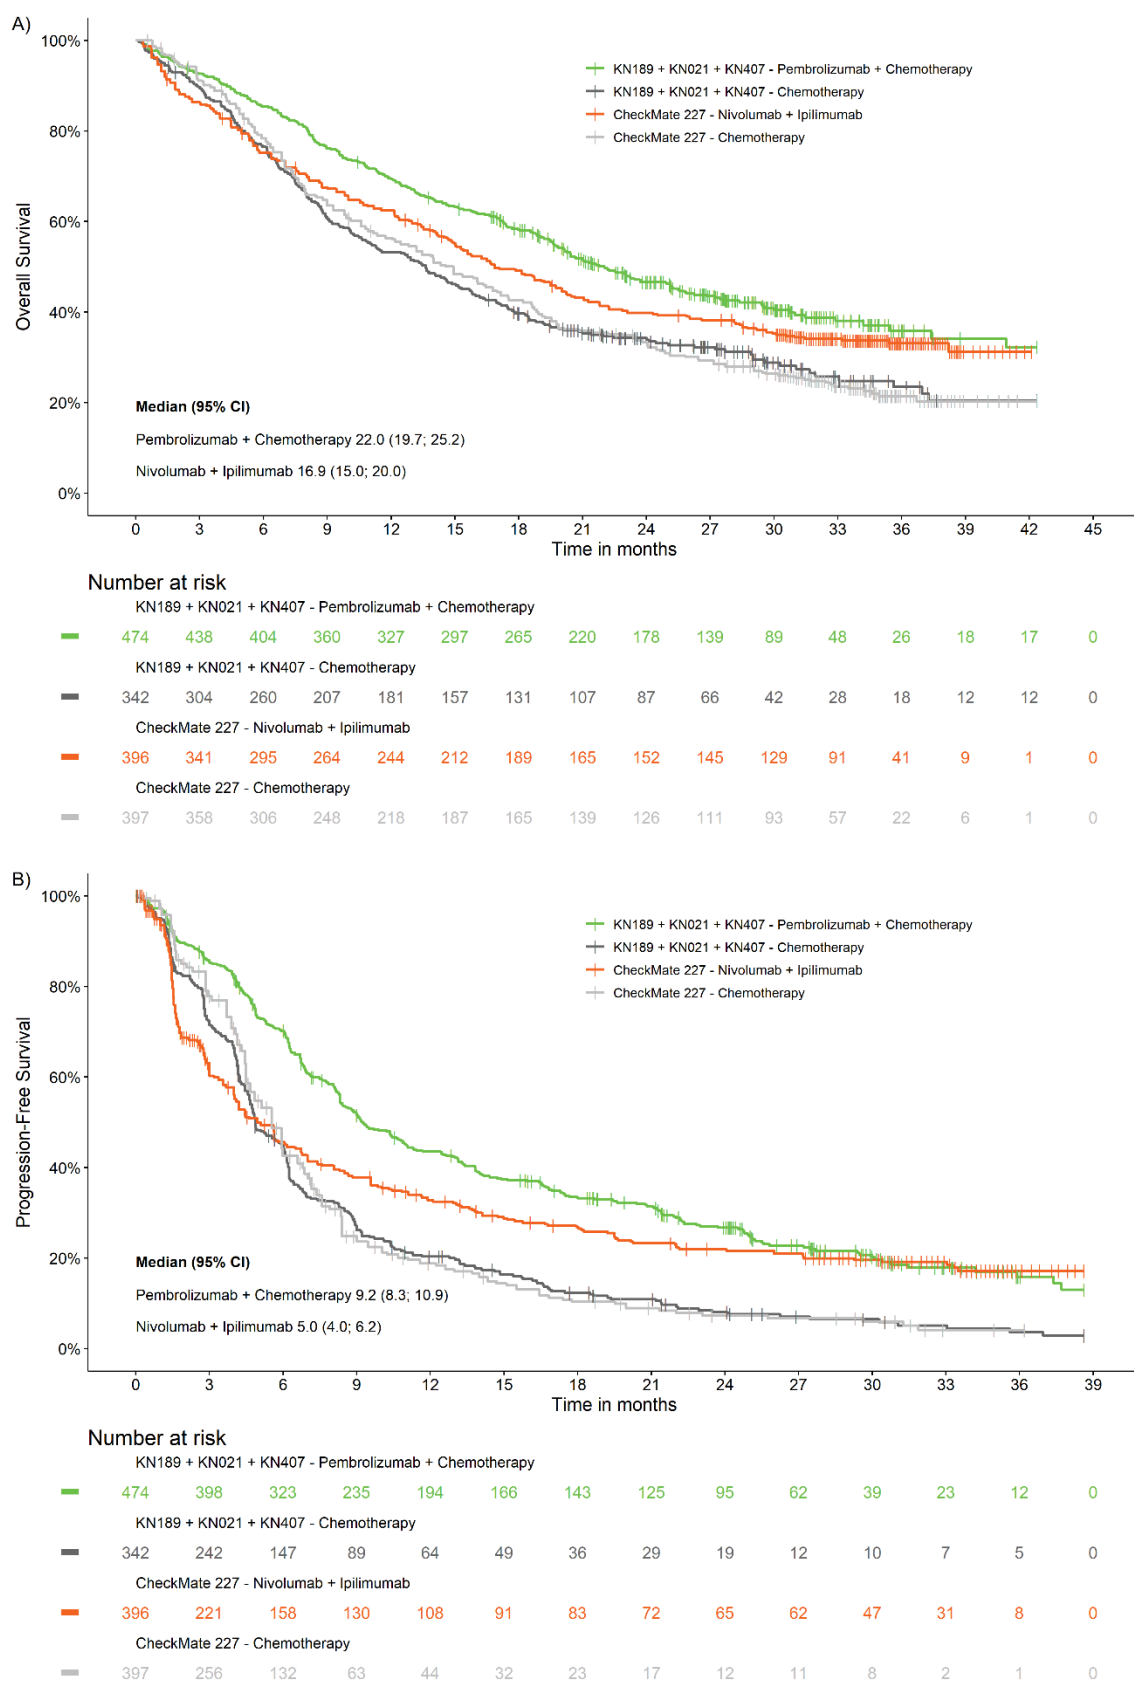

**Figure S1.** Kaplan–Meier curves before matching adjustment for a) overall survival b) progression-free survival.

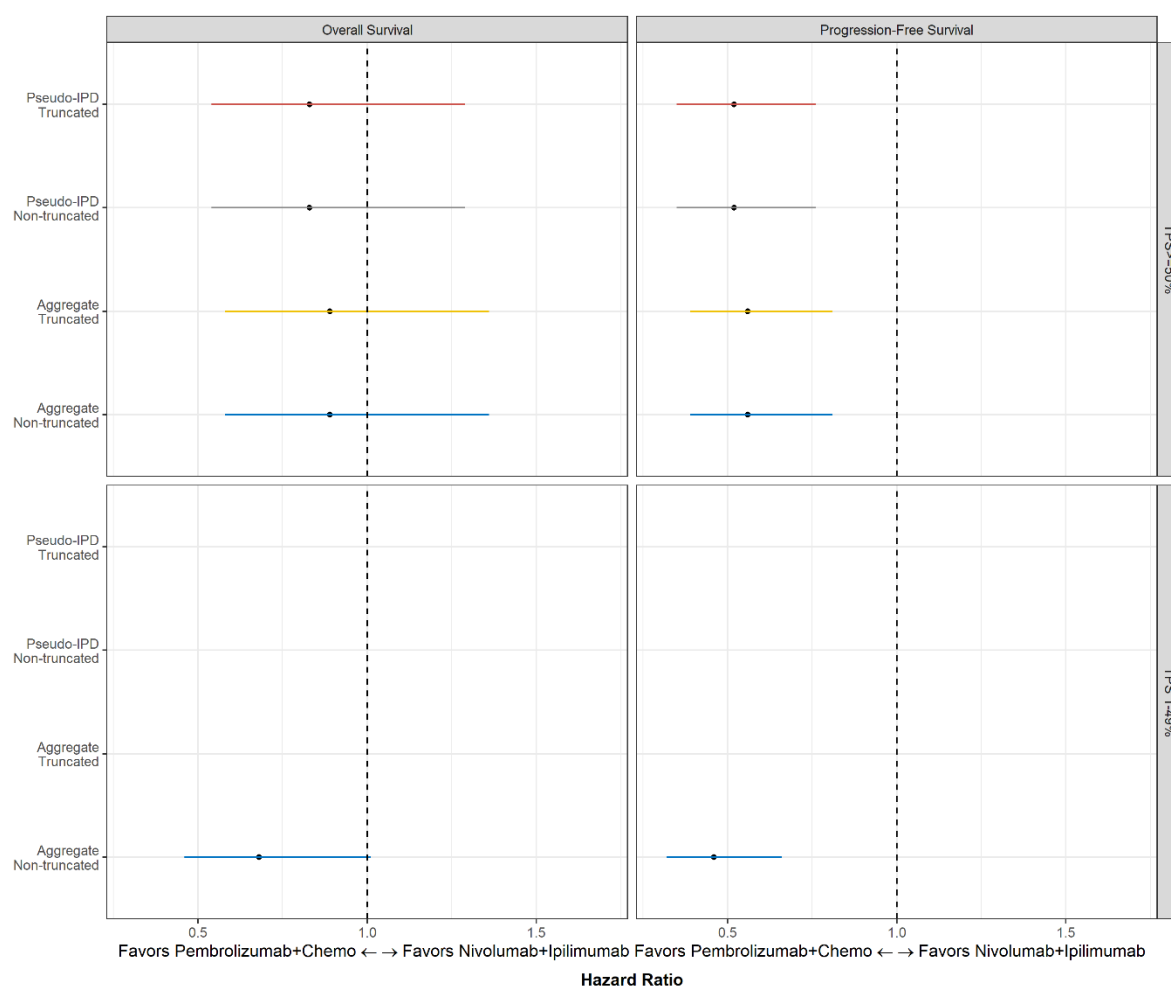

**Figure S2.** Forest plot of pembrolizumab+chemotherapy versus nivolumab+ipilimumab for overall survival and progression-free survival in patients with PD-L1 TPS 1–49% and  $\geq 50\%$ <sup>a</sup>.

<sup>a</sup>: The results illustrated with the yellow lines refer to the base case analysis.

IPD: individual patient data; PD-L1: Programmed cell death ligand 1; TPS: tumor proportion score.

**Table S3.** Pembrolizumab versus nivolumab+ipilimumab for overall survival and progression-free survival in patients with PD-L1 TPS  $\geq 1\%$ , TPS  $\geq 50\%$  and TPS 1–49%.

|                                                | Hazard Ratio (95% CI) |                   |
|------------------------------------------------|-----------------------|-------------------|
|                                                | Before Matching       | After Matching    |
| <b>Overall Survival, <math>\geq 1\%</math></b> |                       |                   |
| Aggregate, truncated <sup>a</sup>              | 0.84 (0.63, 1.11)     | 0.80 (0.59, 1.09) |
| Pseudo IPD, truncated                          | 0.82 (0.64, 1.04)     | 0.75 (0.57, 0.99) |

|                                                                 |                   |                   |
|-----------------------------------------------------------------|-------------------|-------------------|
| Aggregate, non-truncated                                        | 0.84 (0.64, 1.11) | 0.80 (0.59, 1.09) |
| Pseudo IPD, non-truncated                                       | 0.82 (0.64, 1.04) | 0.75 (0.57, 0.99) |
| <b>Progression-Free Survival (BICR), <math>\geq 1\%</math></b>  |                   |                   |
| Aggregate, truncated <sup>a</sup>                               | 0.58 (0.46, 0.74) | 0.53 (0.41, 0.68) |
| Pseudo IPD, truncated                                           | 0.62 (0.49, 0.77) | 0.55 (0.42, 0.71) |
| Aggregate, non-truncated                                        | 0.58 (0.46, 0.74) | 0.53 (0.41, 0.68) |
| Pseudo IPD, non-truncated                                       | 0.62 (0.49, 0.78) | 0.55 (0.42, 0.71) |
| <b>Overall Survival, <math>\geq 50\%</math></b>                 |                   |                   |
| Aggregate, truncated <sup>a</sup>                               | 0.90 (0.63, 1.29) | 0.89 (0.58, 1.36) |
| Pseudo IPD, truncated                                           | 0.87 (0.60, 1.24) | 0.83 (0.54, 1.29) |
| Aggregate, non-truncated                                        | 0.90 (0.63, 1.29) | 0.89 (0.58, 1.36) |
| Pseudo IPD, non-truncated                                       | 0.87 (0.60, 1.24) | 0.83 (0.54, 1.29) |
| <b>Progression-Free Survival (BICR), <math>\geq 50\%</math></b> |                   |                   |
| Aggregate, truncated <sup>a</sup>                               | 0.63 (0.45, 0.88) | 0.56 (0.39, 0.81) |
| Pseudo IPD, truncated                                           | 0.63 (0.45, 0.89) | 0.52 (0.35, 0.76) |
| Aggregate, non-truncated                                        | 0.63 (0.45, 0.88) | 0.56 (0.39, 0.81) |
| Pseudo IPD, non-truncated                                       | 0.63 (0.45, 0.89) | 0.52 (0.35, 0.76) |
| <b>Overall Survival, 1-49%</b>                                  |                   |                   |
| Aggregate, non-truncated                                        | 0.71 (0.50, 1.01) | 0.68 (0.46, 1.01) |
| <b>Progression-Free Survival (BICR), 1-49%</b>                  |                   |                   |
| Aggregate, non-truncated                                        | 0.49 (0.35, 0.69) | 0.46 (0.32, 0.66) |

<sup>a</sup>: The aggregate/truncated analysis corresponds to the base case analysis and is included for comparison purposes.

BICR: blinded independent committee review; CI: confidence intervals; IPD: individual patient data; PD-L1: Programmed cell death ligand 1; TPS: tumor proportion score.
